# Supplementary material for: Updated area-source seismogenic model for seismic hazard of Italy
Source: Copernicus journal article supplement (doi:10.5194/nhess-2022-60), 2022-03-01
Supplement: Supplementary file 1 [file supplement_1.pdf › supplement_1.pdf]

| ZS        | USD | LSD | Hypo1 | Hypo2 | P(hypo1) | P(hypo2) |
|-----------|-----|-----|-------|-------|----------|----------|
| 1         | 0   | 22  | 10    |       | 1.00     |          |
| 2         | 0   | 20  | 7     | 15    | 0.73     | 0.27     |
| 3         | 0   | 17  | 7     | 11    | 0.80     | 0.20     |
| 4         | 0   | 25  | 8     | 16    | 0.81     | 0.19     |
| 5         | 0   | 23  | 7     | 22    | 0.90     | 0.10     |
| 6         | 0   | 12  | 7     |       | 1.00     |          |
| 7         | 0   | 21  | 6     | 12    | 0.76     | 0.24     |
| 8         | 0   | 24  | 8     | 22    | 0.86     | 0.14     |
| 9         | 0   | 15  | 8     |       | 1.00     |          |
| 10        | 4   | 21  | 10    | 16    | 0.63     | 0.37     |
| 11        | 6   | 32  | 11    | 22    | 0.71     | 0.29     |
| 12        | 0   | 29  | 7     | 26    | 0.79     | 0.21     |
| 13        | 0   | 25  | 5     | 14    | 0.51     | 0.49     |
| 14        | 3   | 21  | 9     | 16    | 0.79     | 0.21     |
| 15        | 7   | 21  | 9     | 17    | 0.42     | 0.58     |
| 16        | 1   | 26  | 8     | 21    | 0.85     | 0.15     |
| 17        | 1   | 13  | 8     |       | 1.00     |          |
| 18        | 0   | 17  | 9     |       | 1.00     |          |
| 19shallow | 1   | 15  | 8     |       | 1.00     |          |
| 19deep    | 15  | 30  | 23    |       | 1.00     |          |
| 20shallow | 1   | 15  | 8     |       | 1.00     |          |
| 20deep    | 15  | 30  | 23    |       | 1.00     |          |
| 21        | 2   | 16  | 4     | 7     | 0.17     | 0.83     |
| 22        | 0   | 17  | 6     | 11    | 0.57     | 0.43     |
| 23        | 0   | 19  | 6     | 11    | 0.82     | 0.18     |
| 24        | 0   | 14  | 4     | 9     | 0.34     | 0.66     |
| 25shallow | 1   | 15  | 8     |       | 1.00     |          |
| 25deep    | 15  | 30  | 23    |       | 1.00     |          |
| 26        | 0   | 30  | 7     | 19    | 0.72     | 0.28     |
| 27        | 0   | 22  | 6     | 18    | 0.58     | 0.42     |
| 28        | 0   | 20  | 9     | 11    | 0.35     | 0.65     |
| 29        | 0   | 27  | 7     | 24    | 0.76     | 0.24     |
| 30        | 0   | 32  | 5     | 20    | 0.35     | 0.65     |
| 31        | 0   | 4   | 2     |       | 1.00     |          |
| 32        | 0   | 20  | 8     | 16    | 0.87     | 0.13     |
| 33        | 0   | 17  | 7     | 15    | 0.92     | 0.08     |
| 34        | 0   | 27  | 6     | 18    | 0.45     | 0.55     |
| 35        | 0   | 20  | 7     | 16    | 0.66     | 0.34     |
| 36        | 0   | 27  | 6     | 16    | 0.60     | 0.40     |
| 37        | 0   | 28  | 7     | 18    | 0.45     | 0.55     |
| 38        | 0   | 25  | 10    |       | 1.00     |          |
| 39        | 0   | 22  | 8     | 16    | 0.75     | 0.25     |
| 40        | 0   | 23  | 8     | 18    | 0.67     | 0.33     |
| 41        | 2   | 33  | 9     | 25    | 0.40     | 0.60     |
| 42        | 1   | 24  | 7     | 19    | 0.50     | 0.50     |
| 43        | 0   | 18  | 5     | 11    | 0.41     | 0.59     |
| 44        | 0   | 18  | 9     | 17    | 0.84     | 0.16     |
| 45        | 0   | 20  | 6     | 11    | 0.68     | 0.32     |
| 46        | 0   | 35  | 10    | 28    | 0.59     | 0.41     |
| 47        | 4   | 23  | 10    | 20    | 0.70     | 0.30     |
| 48        | 0   | 31  | 8     | 22    | 0.41     | 0.59     |
| 49        | 0   | 5   | 3     | 5     | 0.70     | 0.30     |
| 50        | 0   | 22  | 6     | 13    | 0.46     | 0.54     |
