# Supplementary material for: Updated area-source seismogenic model for seismic hazard of Italy
Source: Copernicus journal article supplement (doi:10.5194/nhess-2022-60), 2022-03-01
Supplement: Supplementary file 2 [file supplement_2.pdf › supplement_2.pdf]

| ZS        | code | Weigth | strike | dip | rake |
|-----------|------|--------|--------|-----|------|
| 1         |      | 0.5    | 219    | 67  | -2   |
| 1         |      | 0.5    | 310    | 87  | -157 |
| 2         |      | 0.425  | 135    | 68  | 160  |
| 2         |      | 0.425  | 232    | 72  | 23   |
| 2         |      | 0.075  | 131    | 25  | 66   |
| 2         |      | 0.075  | 337    | 66  | 101  |
| 3         |      | 0.05   | 292    | 87  | -177 |
| 3         |      | 0.05   | 202    | 87  | -3   |
| 3         |      | 0.45   | 274    | 25  | 112  |
| 3         |      | 0.45   | 70     | 66  | 79   |
| 4         | -2   | 0.8    |        |     |      |
| 4         | -3   | 0.2    |        |     |      |
| 5         | -4   | 1      |        |     |      |
| 6         |      | 0.5    | 295    | 38  | -77  |
| 6         |      | 0.5    | 100    | 52  | -99  |
| 7         | -4   | 1      |        |     |      |
| 8         | -4   | 1      |        |     |      |
| 9         | -2   | 1      |        |     |      |
| 10        | -2   | 1      |        |     |      |
| 11        | -1   | 0.1    |        |     |      |
| 11        | -2   | 0.9    |        |     |      |
| 12        |      | 0.375  | 104    | 60  | -150 |
| 12        |      | 0.375  | 359    | 64  | -32  |
| 12        | -3   | 0.25   |        |     |      |
| 13        | -4   | 1      |        |     |      |
| 14        | -4   | 1      |        |     |      |
| 15        |      | 0.5    | 220    | 45  | 123  |
| 15        |      | 0.5    | 356    | 53  | 60   |
| 16        | -1   | 0.15   |        |     |      |
| 16        | -2   | 0.85   |        |     |      |
| 17        |      | 0.35   | 88     | 67  | -172 |
| 17        |      | 0.35   | 355    | 83  | -22  |
| 17        | -1   | 0.3    |        |     |      |
| 18        |      | 0.15   | 308    | 35  | -90  |
| 18        |      | 0.15   | 129    | 54  | -89  |
| 18        | -2   | 0.7    |        |     |      |
| 19shallow |      | 0.25   | 309    | 44  | -99  |
| 19shallow |      | 0.25   | 142    | 46  | -80  |
| 19shallow |      | 0.175  | 155    | 84  | -175 |
| 19shallow |      | 0.175  | 64     | 85  | -5   |
| 19shallow | -3   | 0.15   |        |     |      |
| 19deep    |      | 0.5    | 278    | 34  | 84   |
| 19deep    |      | 0.5    | 105    | 55  | 93   |
| 20shallow |      | 0.5    | 299    | 36  | 87   |
| 20shallow |      | 0.5    | 122    | 53  | 91   |
| 20deep    |      | 0.5    | 9      | 38  | 26   |
| 20deep    |      | 0.5    | 259    | 73  | 125  |
| 21        |      | 0.5    | 90     | 33  | 66   |
| 21        |      | 0.5    | 297    | 59  | 104  |
| 22        | -4   | 1      |        |     |      |
| 23        | -2   | 1      |        |     |      |
| 24        |      | 0.5    | 321    | 37  | -86  |
| 24        |      | 0.5    | 136    | 52  | -92  |
| 25shallow | -2   | 0.15   |        |     |      |
| 25shallow | -1   | 0.85   |        |     |      |
| 25deep    | -2   | 0.75   |        |     |      |
| 25deep    | -3   | 0.25   |        |     |      |
| 26        |      | 0.2    | 112    | 38  | 61   |
| 26        |      | 0.2    | 327    | 56  | 110  |
| 26        | -2   | 0.6    |        |     |      |
| 27        | -4   | 1      |        |     |      |
| 28        | -4   | 1      |        |     |      |
| 29        | -2   | 0.2    |        |     |      |
| 29        |      | 0.4    | 191    | 44  | 64   |
| 29        |      | 0.4    | 44     | 50  | 112  |
| 30        |      | 0.1    | 267    | 71  | -9   |
| 30        |      | 0.1    | 0      | 80  | -161 |
| 30        |      | 0.4    | 286    | 44  | 92   |
| 30        |      | 0.4    | 102    | 45  | 87   |
| 31        | -4   | 1      |        |     |      |
| 32        | -1   | 1      |        |     |      |
| 33        |      | 0.5    | 135    | 40  | -80  |
| 33        |      | 0.5    | 302    | 50  | -98  |
| 34        |      | 0.5    | 176    | 73  | 0    |
| 34        |      | 0.5    | 86     | 89  | 163  |

| ZS | code | Weigth | strike | dip | rake |
|----|------|--------|--------|-----|------|
| 35 |      | 0.25   | 168    | 31  | -55  |
| 35 |      | 0.25   | 309    | 64  | -108 |
| 35 | -2   | 0.5    |        |     |      |
| 36 |      | 0.5    | 184    | 73  | 10   |
| 36 |      | 0.5    | 90     | 79  | 162  |
| 37 | -4   | 1      |        |     |      |
| 38 | -4   | 1      |        |     |      |
| 39 |      | 0.5    | 358    | 39  | -113 |
| 39 |      | 0.5    | 208    | 54  | -71  |
| 40 | -1   | 0.15   |        |     |      |
| 40 | -2   | 0.85   |        |     |      |
| 41 |      | 0.5    | 278    | 59  | 171  |
| 41 |      | 0.5    | 12     | 82  | 31   |
| 42 | -3   | 1      |        |     |      |
| 43 |      | 0.275  | 24     | 45  | 41   |
| 43 |      | 0.275  | 262    | 61  | 127  |
| 43 |      | 0.225  | 72     | 38  | 90   |
| 43 |      | 0.225  | 252    | 51  | 89   |
| 44 | -2   | 1      |        |     |      |
| 45 |      | 0.125  | 100    | 36  | -93  |
| 45 |      | 0.125  | 285    | 53  | -87  |
| 45 | -2   | 0.75   |        |     |      |
| 46 |      | 0.5    | 270    | 50  | 34   |
| 46 |      | 0.5    | 157    | 65  | 135  |
| 47 |      | 0.4    | 189    | 70  | -5   |
| 47 |      | 0.4    | 281    | 85  | -160 |
| 47 | -3   | 0.2    |        |     |      |
| 48 |      | 0.45   | 190    | 80  | 4    |
| 48 |      | 0.45   | 99     | 85  | 169  |
| 48 | -3   | 0.1    |        |     |      |
| 49 |      | 0.5    | 317    | 62  | 161  |
| 49 |      | 0.5    | 56     | 73  | 29   |
| 50 | -1   | 0.5    |        |     |      |
| 50 |      | 0.15   | 253    | 11  | -29  |
| 50 |      | 0.15   | 11     | 84  | -99  |
| 50 | -3   | 0.2    |        |     |      |
