# Supplementary material for: Updated area-source seismogenic model for seismic hazard of Italy
Source: Copernicus journal article supplement (doi:10.5194/nhess-2022-60), 2022-03-01
Supplement: Supplementary file 3 [file supplement_3.pdf › supplement_3.pdf]

|    |     |        |        |       |      |                                 |              |             |                                  | Statistical Completeness          |                                    |                                 |       |      |                                 |              |             |                                  |                                   |                                  |                                 |       |      |                                 | Historical Completeness |             |                                  |                                   |                                  |                                 |  |
|----|-----|--------|--------|-------|------|---------------------------------|--------------|-------------|----------------------------------|-----------------------------------|------------------------------------|---------------------------------|-------|------|---------------------------------|--------------|-------------|----------------------------------|-----------------------------------|----------------------------------|---------------------------------|-------|------|---------------------------------|-------------------------|-------------|----------------------------------|-----------------------------------|----------------------------------|---------------------------------|--|
| MA | ZS  | Mwmax1 | Mwmax2 | Mt ZS | b zs | $\Lambda$ (M)as<br>approach (i) | Mt Macroarea | b macroarea | $\Lambda$ (M)as<br>approach (ii) | $\Lambda$ (M)as<br>approach (iii) | L $\Lambda$ (M)as<br>approach (iv) | $\Lambda$ (M)as<br>approach (v) | Mt ZS | b zs | $\Lambda$ (M)as<br>approach (i) | Mt Macroarea | b macroarea | $\Lambda$ (M)as<br>approach (ii) | $\Lambda$ (M)as<br>approach (iii) | $\Lambda$ (M)as<br>approach (iv) | $\Lambda$ (M)as<br>approach (v) | Mt ZS | b zs | $\Lambda$ (M)as<br>approach (i) | Mt Macroarea            | b macroarea | $\Lambda$ (M)as<br>approach (ii) | $\Lambda$ (M)as<br>approach (iii) | $\Lambda$ (M)as<br>approach (iv) | $\Lambda$ (M)as<br>approach (v) |  |
| 1  | 1   | 6.9    | 7.2    | 4.19  | 1.10 | 0.1663                          | 4.19         | 1.17        | 0.1392                           | 0.1519                            | 0.1762                             | 0.1478                          | 4.19  | 1.14 | 0.1548                          | 4.19         | 1.21        | 0.1648                           | 0.1380                            | 0.1642                           | 0.1887                          |       |      |                                 |                         |             |                                  |                                   |                                  |                                 |  |
| 1  | 2   | 6.9    | 7.2    | 4.19  | 1.20 | 0.2270                          | 4.19         | 1.17        | 0.2541                           | 0.2457                            | 0.2140                             | 0.2453                          | 4.19  | 1.20 | 0.2397                          | 4.19         | 1.21        | 0.2108                           | 0.2376                            | 0.2347                           | 0.2802                          |       |      |                                 |                         |             |                                  |                                   |                                  |                                 |  |
| 2  | 3   | 6.9    | 7.2    | 4.42  | 0.97 | 0.3579                          | 4.42         | 1.03        | 0.2456                           | 0.3586                            | 0.3908                             | 0.3197                          | 4.42  | 1.08 | 0.2343                          | 4.42         | 1.11        | 0.2739                           | 0.1930                            | 0.2529                           | 0.3043                          |       |      |                                 |                         |             |                                  |                                   |                                  |                                 |  |
| 2  | 7   | 6.9    | 7.2    | 4.42  | 1.20 | 0.0762                          | 4.88         | 1.03        | 0.1784                           | 0.1158                            | 0.1158                             | 0.2142                          | 4.88  | 1.20 | 0.1351                          | 4.42         | 1.11        | 0.0622                           | 0.1519                            | 0.0978                           | 0.0978                          |       |      |                                 |                         |             |                                  |                                   |                                  |                                 |  |
| 2  | 12  | 6.9    | 7.2    | 4.42  | 1.03 | 0.0358                          | 4.19         | 1.03        | 0.0362                           | 0.0498                            | 0.0489                             | 0.0451                          | 4.19  | 0.98 | 0.0397                          | 4.42         | 1.11        | 0.0457                           | 0.0298                            | 0.0427                           | 0.0599                          |       |      |                                 |                         |             |                                  |                                   |                                  |                                 |  |
| 2  | 13  | 6.9    | 7.2    | 4.42  | 1.00 | 0.0032                          | 4.19         | 1.03        | 0.0127                           | 0.0130                            | 0.0135                             | 0.0129                          | 4.19  | 1.00 | 0.0105                          | 4.42         | 1.11        | 0.0026                           | 0.0098                            | 0.0090                           | 0.0108                          |       |      |                                 |                         |             |                                  |                                   |                                  |                                 |  |
| 3  | 4   | 6.7    | 7.0    | 4.19  | 1.20 | 0.0651                          | 4.19         | 1.17        | 0.0925                           | 0.1036                            | 0.1088                             | 0.0976                          | 4.19  | 1.20 | 0.0932                          | 4.19         | 1.26        | 0.0522                           | 0.0776                            | 0.0871                           | 0.0928                          |       |      |                                 |                         |             |                                  |                                   |                                  |                                 |  |
| 3  | 5   | 6.7    | 7.0    | 4.19  | 1.20 | 0.1200                          | 4.19         | 1.17        | 0.1301                           | 0.1278                            | 0.1140                             | 0.1411                          | 4.19  | 1.20 | 0.1411                          | 4.19         | 1.26        | 0.1054                           | 0.1188                            | 0.1184                           | 0.1066                          |       |      |                                 |                         |             |                                  |                                   |                                  |                                 |  |
| 3  | 6   | 6.7    | 7.0    | 4.19  | 1.00 | 0.0238                          | 4.65         | 1.17        | 0.0711                           | 0.0475                            | 0.0460                             | 0.0577                          | 4.65  | 1.00 | 0.0564                          | 4.19         | 1.26        | 0.0193                           | 0.0625                            | 0.0431                           | 0.0431                          |       |      |                                 |                         |             |                                  |                                   |                                  |                                 |  |
| 3  | 8   | 6.7    | 7.0    | 4.19  | 1.00 | 0.0357                          | 4.65         | 1.17        | 0.0431                           | 0.0393                            | 0.0318                             | 0.0356                          | 4.65  | 1.00 | 0.0469                          | 4.19         | 1.26        | 0.0389                           | 0.0521                            | 0.0550                           | 0.0535                          |       |      |                                 |                         |             |                                  |                                   |                                  |                                 |  |
| 3  | 9   | 6.7    | 7.0    | 4.19  | 0.72 | 0.1694                          | 3.96         | 1.17        | 0.0333                           | 0.0693                            | 0.0749                             | 0.0623                          | 3.96  | 0.76 | 0.0569                          | 4.19         | 1.26        | 0.1435                           | 0.0224                            | 0.0571                           | 0.0571                          |       |      |                                 |                         |             |                                  |                                   |                                  |                                 |  |
| 3  | 10  | 6.7    | 7.0    | 4.19  | 1.20 | 0.1244                          | 4.42         | 1.17        | 0.1300                           | 0.1272                            | 0.1215                             | 0.1380                          | 4.42  | 1.20 | 0.1348                          | 4.19         | 1.26        | 0.1101                           | 0.1096                            | 0.1280                           | 0.1177                          |       |      |                                 |                         |             |                                  |                                   |                                  |                                 |  |
| 3  | 11  | 6.7    | 7.0    | 4.19  | 1.20 | 0.0431                          | 4.19         | 1.17        | 0.0814                           | 0.0783                            | 0.0844                             | 0.0850                          | 4.19  | 1.20 | 0.0831                          | 4.19         | 1.26        | 0.0431                           | 0.0694                            | 0.0745                           | 0.0705                          |       |      |                                 |                         |             |                                  |                                   |                                  |                                 |  |
| 4  | 14  | 6.6    | 6.9    | 4.42  | 0.97 | 0.0522                          | 4.42         | 0.94        | 0.0497                           | 0.0531                            | 0.0573                             | 0.0495                          | 4.42  | 1.05 | 0.0484                          | 4.42         | 1.02        | 0.0499                           | 0.0474                            | 0.0519                           | 0.0560                          |       |      |                                 |                         |             |                                  |                                   |                                  |                                 |  |
| 4  | 15  | 6.6    | 6.9    | 4.42  | 1.00 | 0.0185                          | 4.42         | 0.94        | 0.0210                           | 0.0188                            | 0.0238                             | 0.0158                          | 4.42  | 1.00 | 0.0155                          | 4.42         | 1.02        | 0.0177                           | 0.0201                            | 0.0183                           | 0.0233                          |       |      |                                 |                         |             |                                  |                                   |                                  |                                 |  |
| 5  | 22  | 6.5    | 6.8    | 4.19  | 1.05 | 0.1603                          | 4.19         | 1.02        | 0.1498                           | 0.1799                            | 0.1241                             | 0.1598                          | 4.19  | 1.06 | 0.1654                          | 4.19         | 1.06        | 0.1769                           | 0.1767                            | 0.1840                           | 0.1484                          |       |      |                                 |                         |             |                                  |                                   |                                  |                                 |  |
| 5  | 27  | 6.5    | 6.8    | 4.19  | 1.00 | 0.0117                          | 4.88         | 1.02        | 0.0407                           | 0.0287                            | 0.0312                             | 0.0359                          | 3.96  | 1.00 | 0.0104                          | 4.19         | 1.06        | 0.0100                           | 0.0134                            | 0.0157                           | 0.0189                          |       |      |                                 |                         |             |                                  |                                   |                                  |                                 |  |
| 5  | 28  | 6.5    | 6.8    | 4.19  | 0.97 | 0.0670                          | 4.19         | 1.02        | 0.0485                           | 0.0673                            | 0.0606                             | 0.0593                          | 4.19  | 1.09 | 0.0506                          | 4.19         | 1.06        | 0.0578                           | 0.0547                            | 0.0578                           | 0.0498                          |       |      |                                 |                         |             |                                  |                                   |                                  |                                 |  |
| 6  | 17  | 7.4    | 7.7    | 4.19  | 0.97 | 0.0713                          | 4.19         | 0.94        | 0.0948                           | 0.0940                            | 0.1006                             | 0.0881                          | 4.19  | 1.03 | 0.0861                          | 4.19         | 0.98        | 0.0587                           | 0.0838                            | 0.0830                           | 0.0800                          |       |      |                                 |                         |             |                                  |                                   |                                  |                                 |  |
| 6  | 18  | 7.4    | 7.7    | 4.19  | 0.93 | 0.1729                          | 4.19         | 0.94        | 0.2059                           | 0.2075                            | 0.1957                             | 0.1926                          | 4.19  | 0.99 | 0.1926                          | 4.19         | 0.98        | 0.1397                           | 0.1874                            | 0.1936                           | 0.1950                          |       |      |                                 |                         |             |                                  |                                   |                                  |                                 |  |
| 6  | 23  | 7.4    | 7.7    | 4.19  | 1.20 | 0.0772                          | 4.19         | 0.94        | 0.2069                           | 0.1308                            | 0.0991                             | 0.1585                          | 4.42  | 1.20 | 0.1549                          | 4.19         | 0.98        | 0.0622                           | 0.1727                            | 0.0967                           | 0.0892                          |       |      |                                 |                         |             |                                  |                                   |                                  |                                 |  |
| 6  | 24  | 7.4    | 7.7    | 4.19  | 0.87 | 0.8526                          | 4.19         | 0.94        | 0.6664                           | 0.5733                            | 0.8231                             | 0.6524                          | 4.19  | 0.90 | 0.6450                          | 4.19         | 0.98        | 0.7621                           | 0.5788                            | 0.5291                           | 0.7883                          |       |      |                                 |                         |             |                                  |                                   |                                  |                                 |  |
| 7  | 16  | 7.1    | 7.4    | 4.19  | 0.99 | 0.0407                          | 4.19         | 0.90        | 0.0493                           | 0.0549                            | 0.0501                             | 0.0518                          | 4.19  | 1.03 | 0.0507                          | 4.19         | 0.99        | 0.0369                           | 0.0448                            | 0.0545                           | 0.0436                          |       |      |                                 |                         |             |                                  |                                   |                                  |                                 |  |
| 7  | 19* | 7.1    | 7.4    | 4.19  | 1.00 | 0.1461                          | 4.19         | 0.90        | 0.1939                           | 0.2023                            | 0.1734                             | 0.2186                          | 4.19  | 1.13 | 0.1883                          | 4.19         | 0.99        | 0.1378                           | 0.1851                            | 0.1754                           | 0.1818                          |       |      |                                 |                         |             |                                  |                                   |                                  |                                 |  |
| 7  | 20* | 7.1    | 7.4    | 4.19  | 0.95 | 0.1499                          | 4.42         | 0.90        | 0.2002                           | 0.2406                            | 0.1593                             | 0.2426                          | 4.42  | 1.02 | 0.2089                          | 4.19         | 0.99        | 0.1380                           | 0.1805                            | 0.2226                           | 0.1743                          |       |      |                                 |                         |             |                                  |                                   |                                  |                                 |  |
| 7  | 21  | 7.1    | 7.4    | 4.19  | 1.20 | 0.0692                          | 4.65         | 0.90        | 0.1171                           | 0.1034                            | 0.0788                             | 0.1549                          | 4.65  | 1.20 | 0.1203                          | 4.19         | 0.99        | 0.0580                           | 0.1021                            | 0.0815                           | 0.0717                          |       |      |                                 |                         |             |                                  |                                   |                                  |                                 |  |
| 7  | 25* | 7.1    | 7.4    | 4.19  | 0.96 | 0.2221                          | 4.19         | 0.90        | 0.1400                           | 0.1584                            | 0.1658                             | 0.1583                          | 4.19  | 1.04 | 0.1348                          | 4.19         | 0.99        | 0.1970                           | 0.1229                            | 0.1360                           | 0.1400                          |       |      |                                 |                         |             |                                  |                                   |                                  |                                 |  |
| 7  | 26  | 7.1    | 7.4    | 4.19  | 0.77 | 0.1649                          | 4.19         | 0.90        | 0.0924                           | 0.1366                            | 0.1744                             | 0.1184                          | 4.19  | 0.84 | 0.1069                          | 4.19         | 0.99        | 0.1478                           | 0.0800                            | 0.1250                           | 0.1492                          |       |      |                                 |                         |             |                                  |                                   |                                  |                                 |  |
| 8  | 29  | 6.5    | 6.8    | 4.19  | 1.00 | 0.0485                          | 4.19         | 1.01        | 0.0742                           | 0.0541                            | 0.0478                             | 0.0547                          | 4.42  | 1.00 | 0.0691                          | 4.19         | 1.01        | 0.0883                           | 0.0927                            | 0.0560                           | 0.0643                          |       |      |                                 |                         |             |                                  |                                   |                                  |                                 |  |
| 8  | 30  | 6.5    | 6.8    | 4.19  | 0.83 | 0.1670                          | 4.19         | 1.01        | 0.1413                           | 0.1761                            | 0.2003                             | 0.1590                          | 4.19  | 1.00 | 0.1313                          | 4.19         | 1.01        | 0.1767                           | 0.1723                            | 0.2483                           | 0.2973                          |       |      |                                 |                         |             |                                  |                                   |                                  |                                 |  |
| 9  | 31  | 6.5    | 6.8    | 4.42  | 1.00 | 0.0063                          | 4.42         | 1.49        | 0.0108                           | 0.0069                            | 0.0137                             | 0.0115                          | 4.42  | 1.00 | 0.0054                          | 4.65         | 1.00        | 0.0035                           | 0.0050                            | 0.0035                           | 0.0068                          |       |      |                                 |                         |             |                                  |                                   |                                  |                                 |  |
| 9  | 50  | 6.5    | 6.8    | 4.42  | 1.00 | 0.0881                          | 4.65         | 1.49        | 0.0836                           | 0.1052                            | 0.1202                             | 0.0694                          | 4.65  | 1.00 | 0.0694                          | 4.65         | 1.00        | 0.0659                           | 0.0644                            | 0.0603                           | 0.0632                          |       |      |                                 |                         |             |                                  |                                   |                                  |                                 |  |
| 10 | 32  | 7.5    | 7.8    | 3.96  | 1.00 | 0.0305                          | 4.65         | 0.72        | 0.0545                           | 0.0357                            | 0.0370                             | 0.0563                          | 4.19  | 1.20 | 0.0617                          | 3.96         | 0.73        | 0.0350                           | 0.0848                            | 0.0487                           | 0.0469                          |       |      |                                 |                         |             |                                  |                                   |                                  |                                 |  |
| 10 | 33  | 7.5    | 7.8    | 3.96  | 0.72 | 0.2376                          | 4.42         | 0.72        | 0.2359                           | 0.2459                            | 0.2984                             | 0.2343                          | 3.96  | 0.70 | 0.2230                          | 3.96         | 0.73        | 0.2457                           | 0.1994                            | 0.2448                           | 0.3019                          |       |      |                                 |                         |             |                                  |                                   |                                  |                                 |  |
| 10 | 39  | 7.5    | 7.8    | 3.96  | 0.70 | 0.2653                          | 4.19         | 0.72        | 0.2121                           | 0.2609                            | 0.3284                             | 0.2564                          | 3.96  | 0.71 | 0.2205                          | 3.96         | 0.73        | 0.2392                           | 0.2122                            | 0.2322                           | 0.2796                          |       |      |                                 |                         |             |                                  |                                   |                                  |                                 |  |
| 10 | 40  | 7.5    | 7.8    | 3.96  | 0.97 | 0.1100                          | 4.42         | 0.72        | 0.1410                           | 0.0928                            | 0.0971                             | 0.1364                          | 3.96  | 0.85 | 0.0965                          | 3.96         | 0.73        | 0.0877                           | 0.1112                            | 0.0950                           | 0.0850                          |       |      |                                 |                         |             |                                  |                                   |                                  |                                 |  |
| 11 | 34  | 7.0    | 7.3    | 4.19  | 1.01 | 0.1968                          | 4.42         | 0.88        | 0.2144                           | 0.2191                            | 0.2387                             | 0.2540                          | 4.42  | 0.95 | 0.2263                          | 3.96         | 0.74        | 0.1535                           | 0.1552                            | 0.1709                           | 0.1570                          |       |      |                                 |                         |             |                                  |                                   |                                  |                                 |  |
| 11 | 35  | 7.0    | 7.3    | 4.19  | 0.70 | 0.1231                          | 4.19         | 0.88        | 0.0388                           | 0.0678                            | 0.0965                             | 0.0546                          | 4.19  | 0.70 | 0.0487                          | 3.96         | 0.74        | 0.0834                           | 0.0327                            | 0.0583                           | 0.0765                          |       |      |                                 |                         |             |                                  |                                   |                                  |                                 |  |
| 11 | 36  | 7.0    | 7.3    | 4.19  | 1.20 | 0.0391                          | 4.65         | 0.88        | 0.0775                           | 0.0862                            | 0.0549                             | 0.1097                          | 4.65  | 1.20 | 0.1149                          | 3.96         | 0.74        | 0.0314                           | 0.0682                            | 0.0663                           | 0.0494                          |       |      |                                 |                         |             |                                  |                                   |                                  |                                 |  |
| 11 | 37  | 7.0    | 7.3    | 4.19  | 1.00 | 0.0236                          | 4.19         | 0.88        | 0.0400                           | 0.0275                            | 0.0344                             | 0.0354                          | 4.42  | 1.00 | 0.0316                          | 3.96         | 0.74        | 0.0202                           | 0.0300                            | 0.0235                           | 0.0357                          |       |      |                                 |                         |             |                                  |                                   |                                  |                                 |  |
| 11 | 38  | 7.0    | 7.3    | 4.19  | 1.00 | 0.0146                          | 3.96         | 0.88        | 0.0264                           | 0.0248                            | 0.0368                             | 0.0218                          | 3.96  | 1.00 | 0.0170                          | 3.96         | 0.74        | 0.0183                           | 0.0207                            | 0.0198                           | 0.0198                          |       |      |                                 |                         |             |                                  |                                   |                                  |                                 |  |
| 12 | 43  | 6.7    | 7.0    | 4.42  | 1.20 | 0.1696                          | 4.42         | 1.27        | 0.1448                           | 0.1628                            | 0.1770                             | 0.1513                          | 4.19  | 1.09 | 0.1362                          | 4.42         | 1.22        | 0.1797                           | 0.1420                            | 0.1490                           | 0.1615                          |       |      |                                 |                         |             |                                  |                                   |                                  |                                 |  |
| 12 | 46  | 6.7    | 7.0    | 4.42  | 1.20 | 0.0897                          | 4.42         | 1.27        | 0.0936                           | 0.1046                            | 0.1505                             | 0.1000                          | 4.19  | 1.13 | 0.0860                          | 4.42         | 1.22        | 0.0950                           | 0.0992                            | 0.0976                           | 0.1114                          |       |      |                                 |                         |             |                                  |                                   |                                  |                                 |  |
| 13 | 44  | 6.7    | 7.0    | 4.19  | 1.11 | 0.0927                          | 4.19         | 1.04        | 0.1053                           | 0.0960                            | 0.0969                             | 0.0965                          | 4.19  | 1.17 | 0.0922                          | 4.19         | 1.11        | 0.0813                           | 0.0970                            | 0.0910                           | 0.0969                          |       |      |                                 |                         |             |                                  |                                   |                                  |                                 |  |
| 13 | 45  | 6.7    | 7.0    | 4.19  | 0.96 | 0.0848                          | 4.19         | 1.04        | 0.0722                           | 0.0853                            | 0.0834                             | 0.0792                          | 4.19  | 1.05 | 0.0859                          | 4.19         | 1.11        | 0.0983                           | 0.0826                            | 0.0930                           | 0.0930                          |       |      |                                 |                         |             |                                  |                                   |                                  |                                 |  |
| 14 | 41  | 6.7    | 7.0    | 4.42  | 1.20 | 0.0532                          | 4.42         | 1.27        | 0.0742                           | 0.0713                            | 0.0649                             | 0.0758                          | 4.42  | 1.20 | 0.0741                          | 4.42         | 1           |                                  |                                   |                                  |                                 |       |      |                                 |                         |             |                                  |                                   |                                  |                                 |  |

| ZS | ZS        | % $\Lambda$ (M)as |
|----|-----------|-------------------|
| 19 | 19shallow | 59                |
|    | 19deep    | 41                |
| 20 | 20shallow | 54                |
|    | 20deep    | 46                |
| 25 | 25shallow | 47                |
|    | 25deep    | 53                |
